# Supplementary material for: Sympathetic inputs regulate adaptive thermogenesis in brown adipose tissue through cAMP-Salt inducible kinase axis
Source: PubMed Central journal article supplement (PMC6054673; doi:10.1038/s41598-018-29333-6), 2018-07-20
Supplement: 41598_2018_29333_MOESM1_ESM.pdf [file 41598_2018_29333_MOESM1_ESM.pdf]

## **Sympathetic inputs regulate adaptive thermogenesis in brown adipose tissue through cAMP-Salt inducible kinase axis**

Esther Paulo, Dongmei Wu, Yangmeng Wang, Yun Zhang, Yixuan Wu, Danielle L. Swaney, Margaret Soucheray, David Jimenez-Morales, Ajay Chawla, Nevan J. Krogan, Biao Wang

### **Supplementary information:**

**Supplementary Figure 1: Gnas was specifically deleted in iBAT in Gnas<sup>BKO</sup> mice.** Immunoblots showing amounts of Gnas and Hsp90 in different tissues from ~8-week-old male CON and Gnas<sup>BKO</sup> mice.

**Supplementary Figure 2: CLAMS measurements of CON and Gnas<sup>BKO</sup> mice.** Average oxygen consumption calculated as per body weight (**A**) and per mouse (**B**), respiratory exchange ratio (RER) (**C**), food intake (**D**) and physical activity (**E**) during day and night in ~8-week old male CON and Gnas<sup>BKO</sup> mice. Sample size: CON (n=4) and Gnas<sup>BKO</sup> (n=3).

### **Supplementary Figure 3: Mass spectrometry analysis of iBAT**

**mitochondrial proteome. A**, Frequency of mitochondrial and non-mitochondrial proteins identified by mass spectrometry from isolated mitochondria from iBAT of ~8-10-week old male CON and Gnas<sup>BKO</sup> mice housed at RT. Sample size: n=3 for each genotype. **B**, Immunoblots showing amounts of Hk1 and Hsp60 in iBAT of ~8-10-week old male CON and Gnas<sup>BKO</sup> mice housed at RT.

**Supplementary Figure 4: Cold-induced beige adipocytes formation in iWAT was not affected in  $Gnas^{BKO}$  mice.** **A**, q-PCR analysis of *Ucp1* mRNA levels in iWAT from wild-type B6 mice at different ages and conditions. RT: room temperature; Cold: 8°C for 7 days; PBS or 6-OHDA was injected prior to 3-week of age or cold at 8-week of age. Sample sizes: 3w PBS/RT (n=9), 3w 6-OHDA/RT (n=4), 8w PBS/RT (n=3), 8w PBS/Cold (n=12) and 8w 6-OHDA/Cold (n=4). **B**, Immunoblots showing protein amounts of Ucp1, phosphor-PKA substrates and Hsp90 in iWAT from 3-week-old wild-type B6 pups with or without 6-OHDA injection. **C**, Immunoblots showing protein amounts of Ucp1, phosphor-PKA substrates and Hsp90 in iWAT from 8-week-old wild-type B6 mice under room temperature or after 7-day 8°C cold stimulation with or without 6-OHDA injection. **D**, q-PCR analysis of *Ucp1* mRNA levels in iWAT from ~8-week-old CON and  $\beta$ less mice at room temperature and after 7-day 8°C cold. Sample sizes: CON/RT (n=4),  $\beta$ less/RT (n=6), CON/Cold (n=6) and  $\beta$ less/Cold (n=4). **E**, q-PCR analysis of *Ucp1* mRNA levels in iWAT from  $Gnas^{ff}$  (CON), Adiponectin-Cre; $Gnas^{ff}$  ( $Gnas^{AKO}$ ) and Ucp1-Cre; $Gnas^{ff}$  ( $Gnas^{BKO}$ ) mice at 3 and 8-week of age, and with 7-day 8°C cold stimulations. Sample sizes: 3w CON (n=15), 3w  $Gnas^{BKO}$  (n=4), 3w  $Gnas^{AKO}$  (n=5), 8w RT/CON (n=6), 8w RT/ $Gnas^{BKO}$  (n=4), 8w RT/ $Gnas^{AKO}$  (n=3), 8w Cold/CON (n=6), 8w Cold/ $Gnas^{BKO}$  (n=4) and 8w/Cold  $Gnas^{AKO}$  (n=3). **F**, Representative H&E staining of iWAT from 6-8-week-old CON,  $Gnas^{AKO}$  and  $Gnas^{BKO}$  mice at RT or after 7-day 8°C cold stimulation. Scale bar: 50 $\mu$ m. Arrows showing multilocular beige adipocytes. **G**, Diagram showing

effects of sympathetic innervation and adipocyte cAMP signaling on beige adipocyte genesis and renaissance.

**Supplementary Figure 5:  $Gnas^{BKO}$  mice exhibited a fat redistribution**

**phenotype at normal chow. A,** Body mass, lean and fat mass (measured by DEXA) of ~10-week-old male CON and  $Gnas^{BKO}$  mice housed at RT and 30°C. Sample size: CON/RT (n=4),  $Gnas^{BKO}$ /RT (n=5), CON/30°C (n=4) and  $Gnas^{BKO}$ /30°C (n=5). **B,** Tissue mass of iWAT, eWAT, BAT and liver from ~10-week-old male CON and  $Gnas^{BKO}$  mice housed at RT and 30°C. Sample size: CON/RT (n=11),  $Gnas^{BKO}$ /RT (n=7), CON/30°C (n=7) and  $Gnas^{BKO}$ /30°C (n=8).

**Supplementary Figure 6: Abundance of  $Pdgfra^+Sca1^+$  progenitors in the**

**eWAT of  $Gnas^{BKO}$  mice after HFD.** Numbers of  $Pdgfra^+Sca1^+$  progenitors (determined by flow cytometry) in the eWAT of  $Gnas^{BKO}$  mice after HFD. Sample size: CON (n=5) and  $Gnas^{BKO}$  (n=8).

**Supplementary Figure 7:  $Sik2$  was a SIK isoform enriched in adipose**

**tissue.** Immunoblots of  $Sik2$  and  $Hsp90$  in different tissues from ~8-week-old male wild-type (WT) and  $Sik2$  KO mice.

**Supplementary Figure 8: Effects of SIK deficiency on  $Ucp1$  expression. A,**

q-PCR analysis of *Ucp1*, *Dio2* and *Pgc1 $\alpha$*  mRNA levels in differentiated brown adipocytes treated with control or  $Sik1$  and  $Sik2$  knockdown adenovirus. Effects

of 4-hour FSK stimulation shown. **B**, q-PCR analysis of *Ucp1* and *Sik2* mRNA levels in iBAT from ~8-week-old male WT and *Sik2* KO mice. Sample size: WT (n=3) and *Sik2* KO (n=4). **C**, Immunoblots showing *Ucp1*, *Sik2* and Hsp90 in iBAT from ~8-week-old male WT and *Sik2* KO mice. **D**, q-PCR analysis of *Ucp1* and *Sik1* mRNA levels in iBAT from ~8-week-old male WT and *Sik1* KO mice. Sample size: n=3 per each genotype. **E**, Immunoblots showing *Ucp1* and Hsp90 in iBAT from ~8-week-old male WT and *Sik1* KO mice.

**Supplementary Figure 9: Expression of SIK isoforms in iBAT at RT and thermoneutrality.** q-PCR analysis of *Sik1*, *Sik2* and *Sik3* in iBAT from ~10-week-old male C57bl/6J mice housed at RT and thermoneutrality.

**Supplementary Figure 10: CLAMS measurements, lipolysis activity and mitochondrial gene expression in iBAT of WT and *Sik2* KO mice at thermoneutrality.** Average oxygen consumption calculated as per body weight (**A**) and per mouse (**B**), respiratory exchange ratio (RER) (**C**), food intake (**D**) and physical activity (**E**) during day and night in ~12-week old male CON and *Sik2* KO mice. Sample size: n=4 per genotype. **F**, Area under the curve (AUC) of oxygen consumption recordings in response to norepinephrine in ~10-week-old male WT and *Sik2* KO mice housed 30°C. Sample size: n=3 for each genotypes. **G**, *In vitro* glycerol release rates (treated with 10uM FSK) of iBAT from ~10-week-old male WT and *Sik2* KO mice housed 30°C. Sample size: n=4 for each genotypes. q-PCR analysis of relative mRNA levels of nuclear (**H**) and

mitochondrial (I) encoded ETC gene expression in ~12-week old male CON and Sik2 KO mice. Sample size: n=5 per genotypes.

**Supplementary Figure 11: Brown adipocyte-specific deletion of Hdac4 did not show thermogenic defects *in vivo*.** **A**, q-PCR analysis of *Ucp1* and *Glut4* in differentiated brown adipocytes. Effects of FSK and LMK235 alone or combined shown. **B**, q-PCR analysis of *Hdac4*, *Ucp1* and other thermogenic genes in iBAT from ~8-week-old male CON and Hdac4<sup>BKO</sup> mice. Sample size: CON (n=4) and Hdac4<sup>BKO</sup> (n=3). **C**, Immunoblots showing amounts of Ucp1, Hdac4 and Hsp90 in iBAT of from ~8-week-old male CON and Hdac4<sup>BKO</sup> mice. Oxygen consumption recordings in response to NE in ~8-week-old male CON and Hdac4<sup>BKO</sup> mice. Average oxygen consumption calculated as per body weight (**E**) and per mouse (**F**), respiratory exchange ratio (RER) (**G**), food intake (**H**) and physical activity (**I**) during day and night in ~8-week-old male CON and Hdac4<sup>BKO</sup> mice. Sample size: n=6 per genotype.

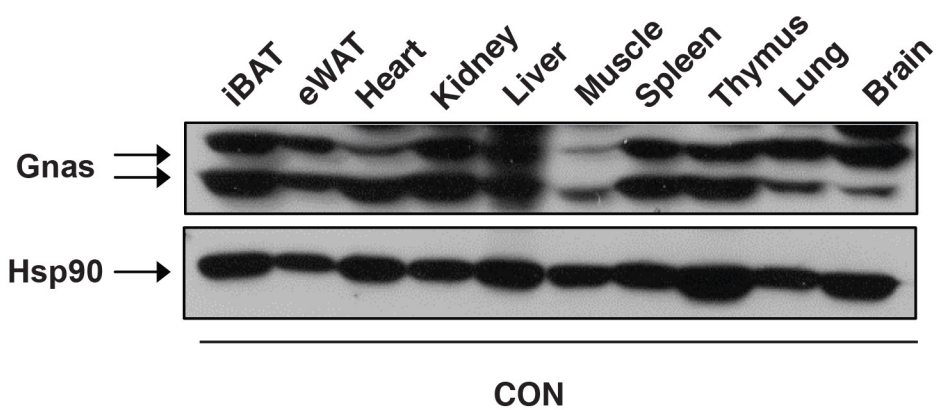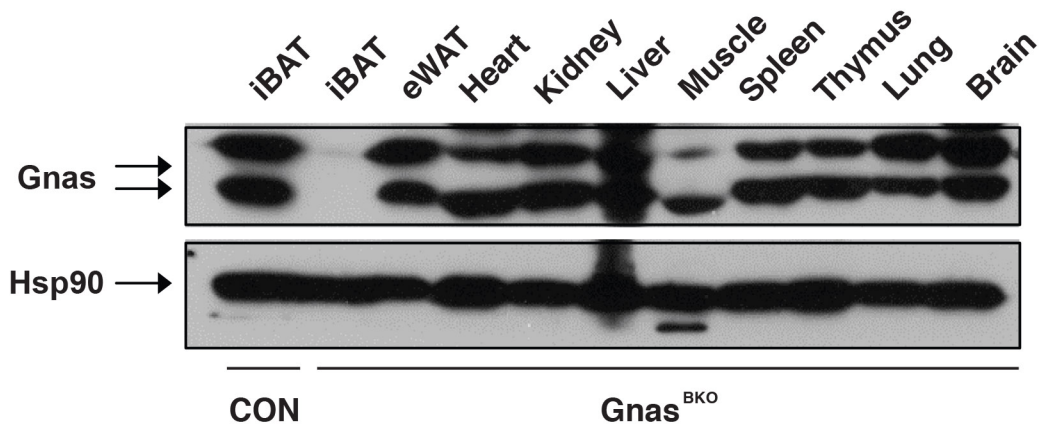

**Supplementary Figure 1**

**A**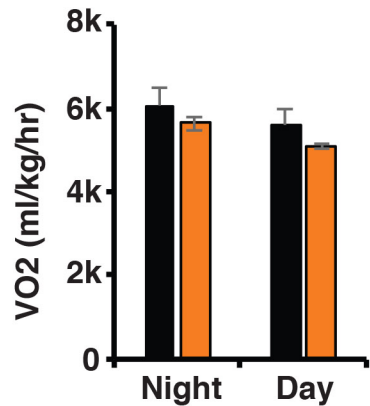**B**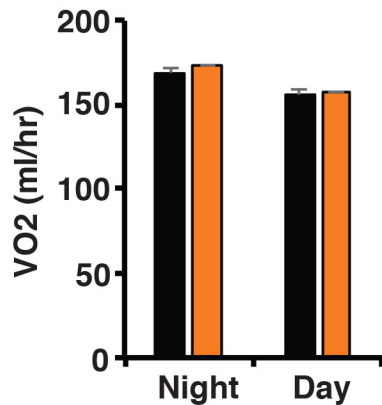**C**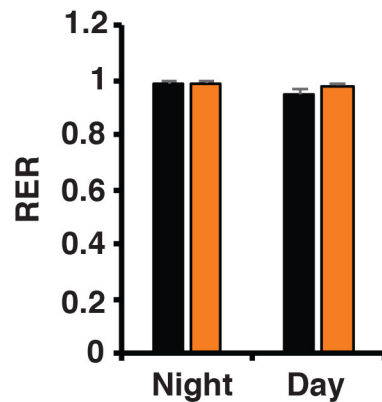**D**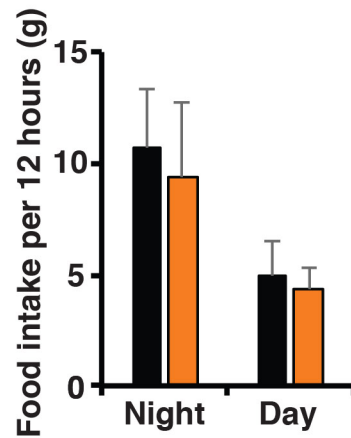**E**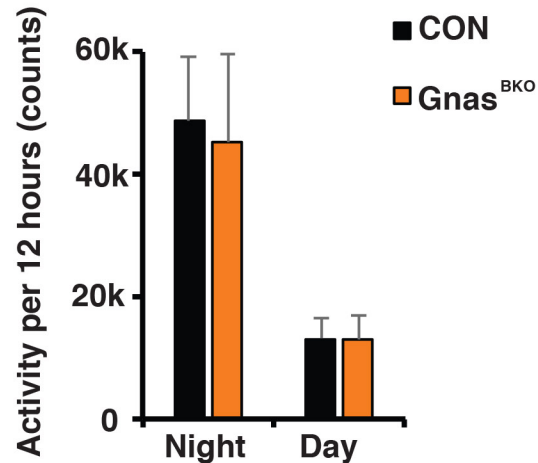

# Supplementary Figure 2

**A**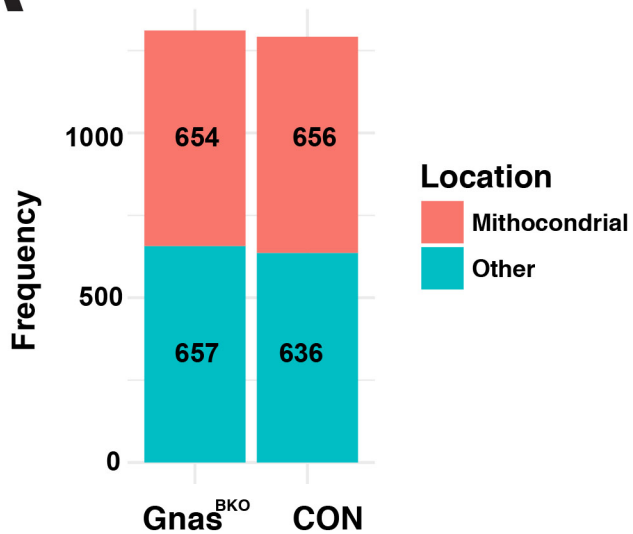**B**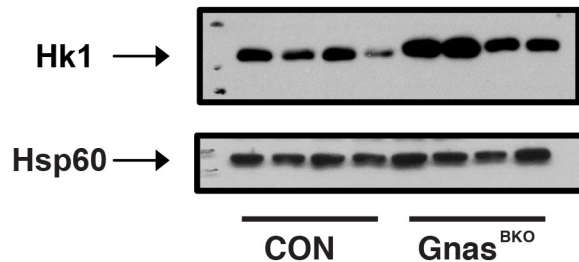**Supplementary Figure 3**



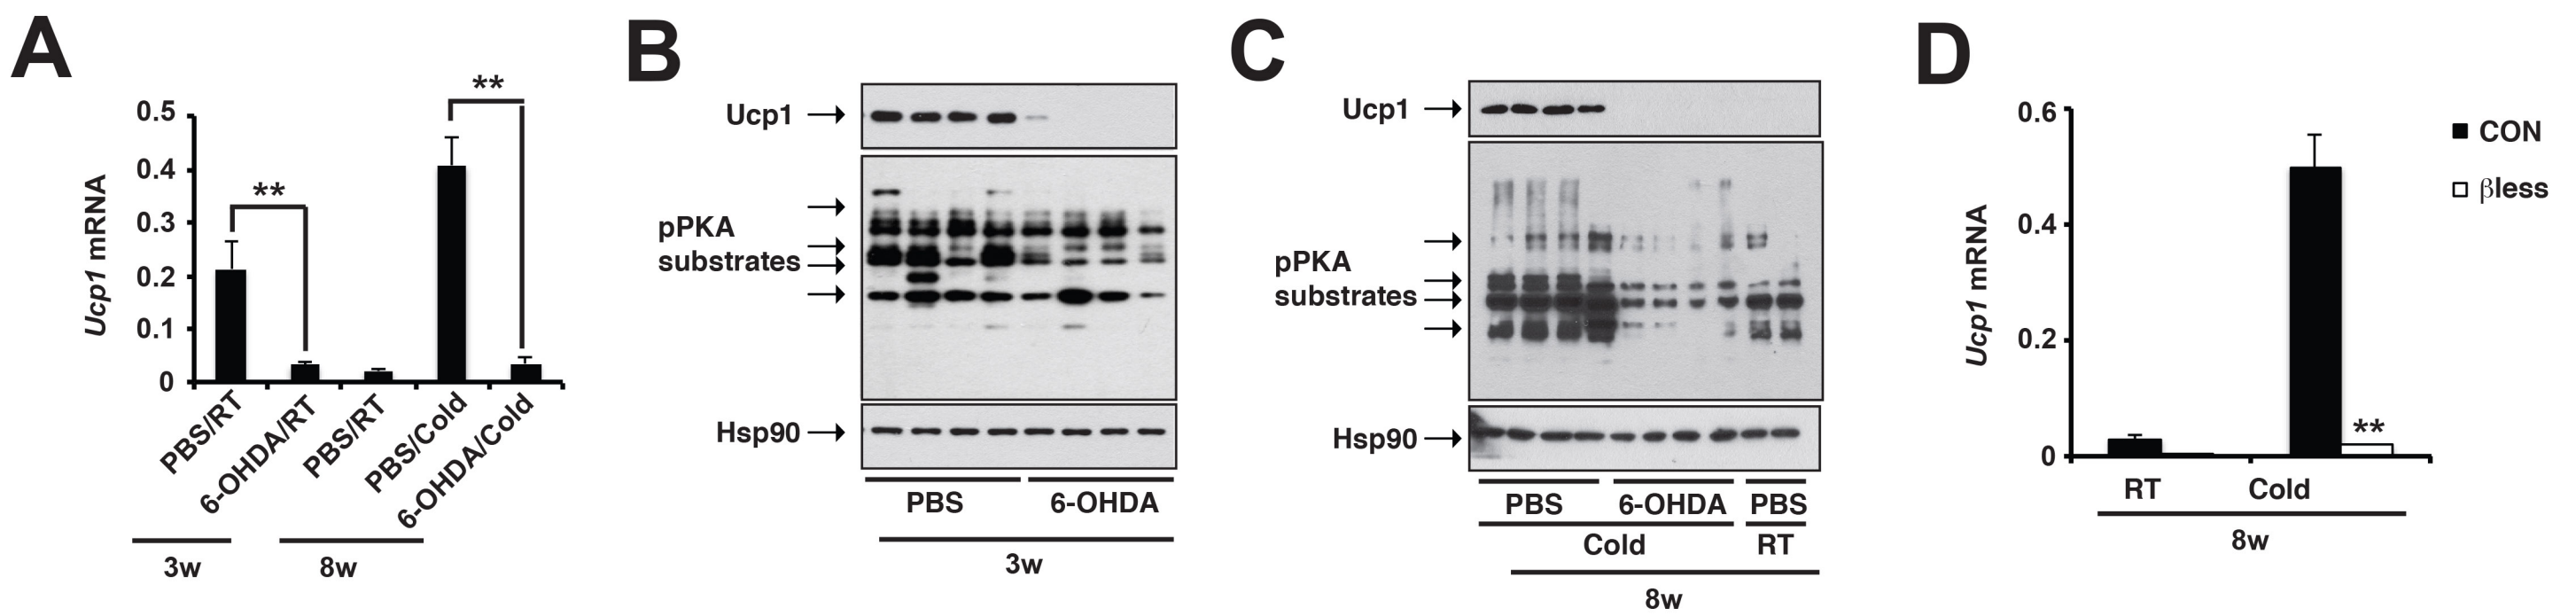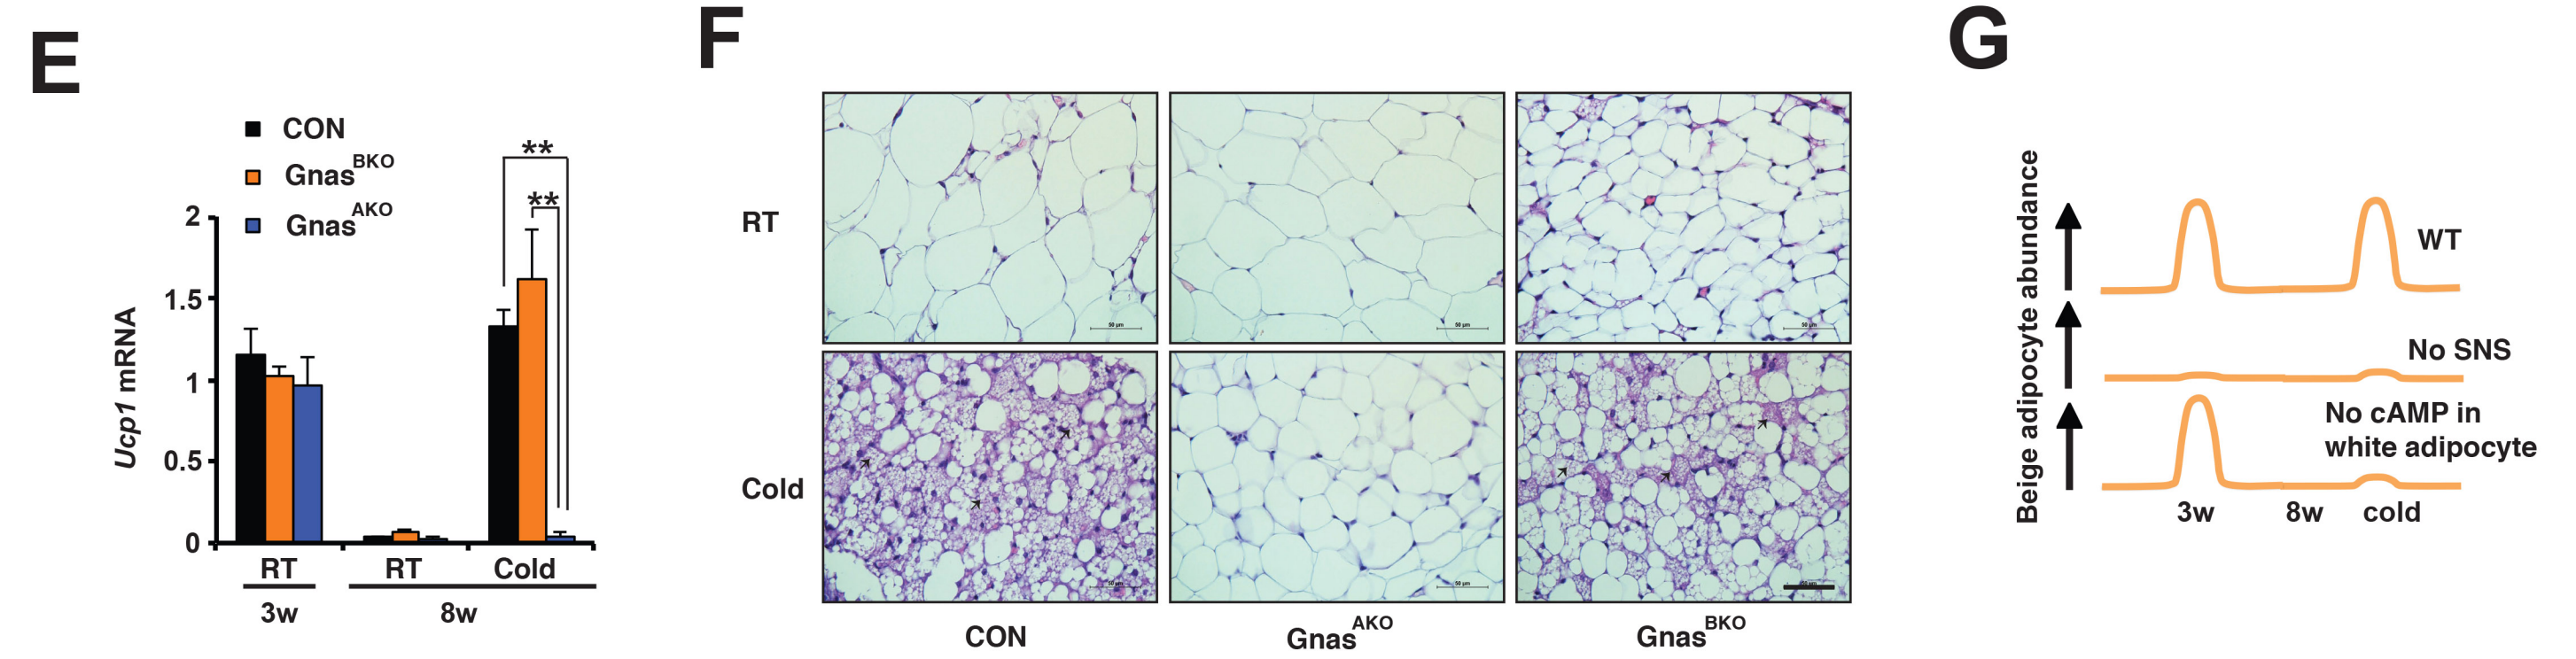

**Supplementary Figure 4**

**A**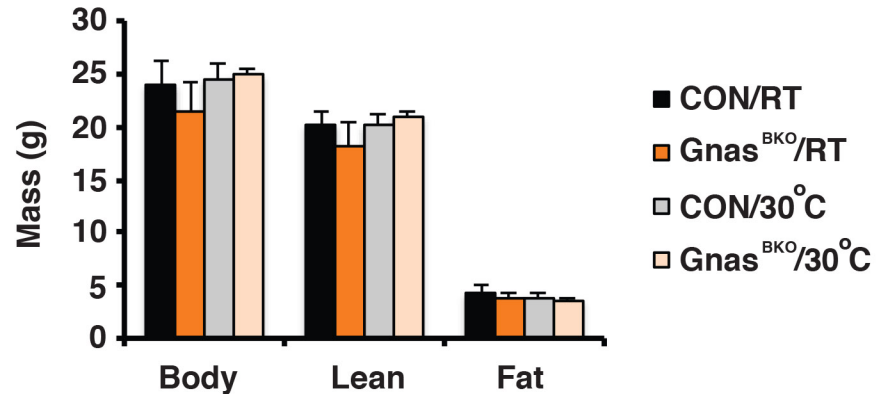**B**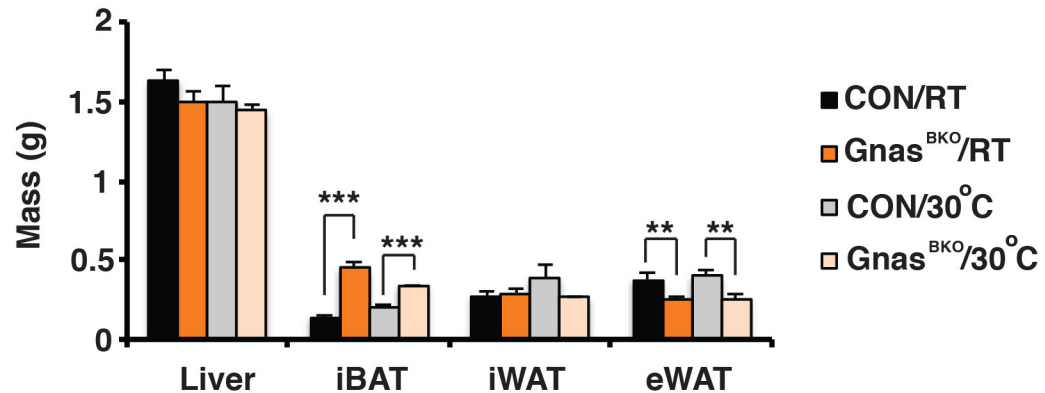**Supplementary Figure 5**

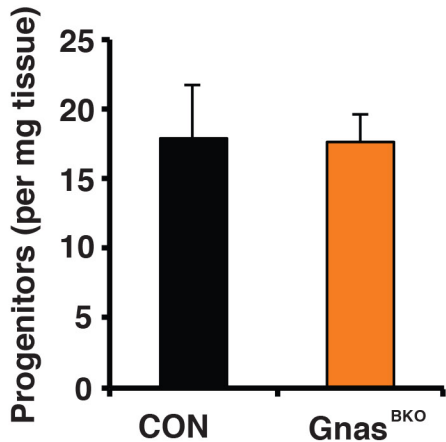

# Supplementary Figure 6

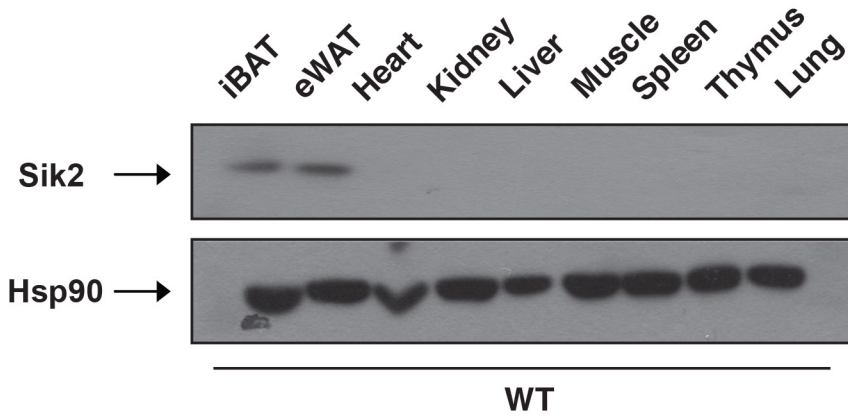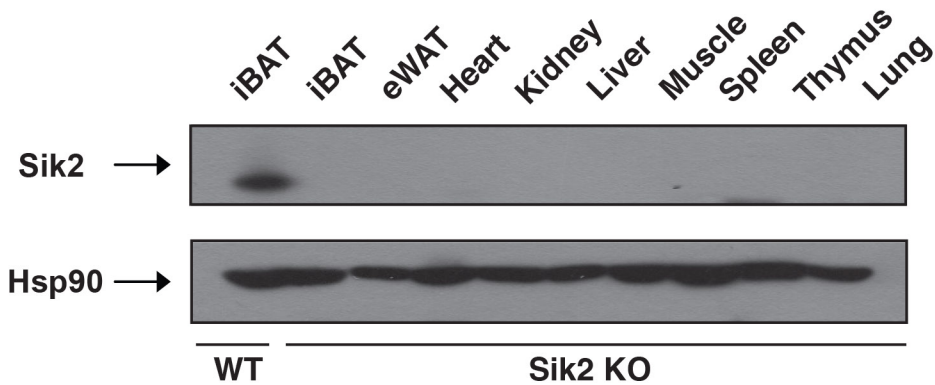

**Supplementary Figure 7**

**A**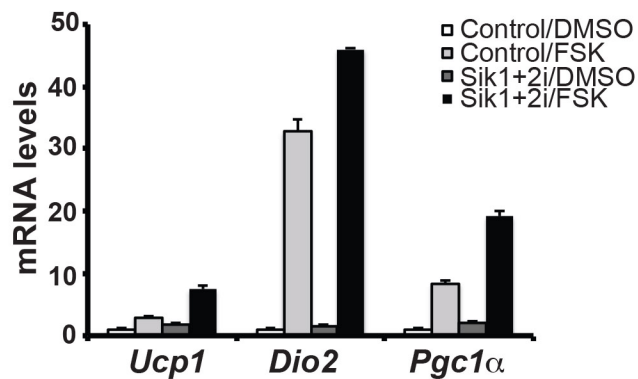**B**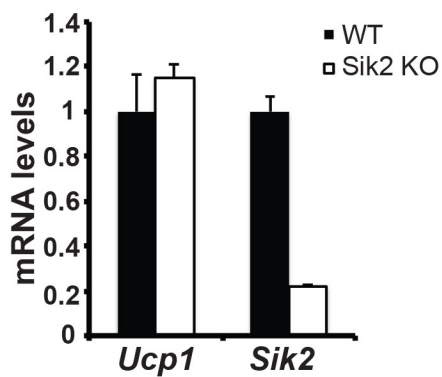**C**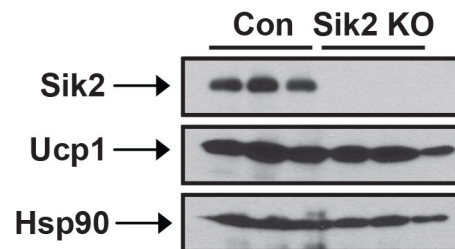**D**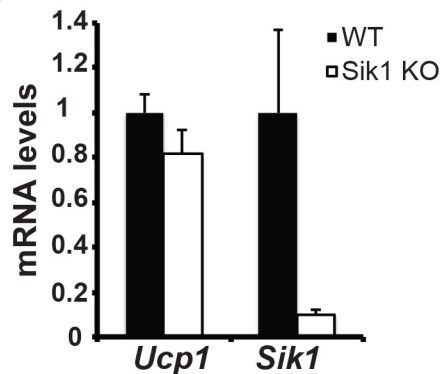**E**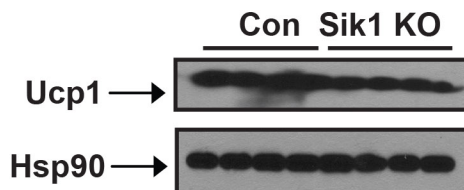

# Supplementary Figure 8

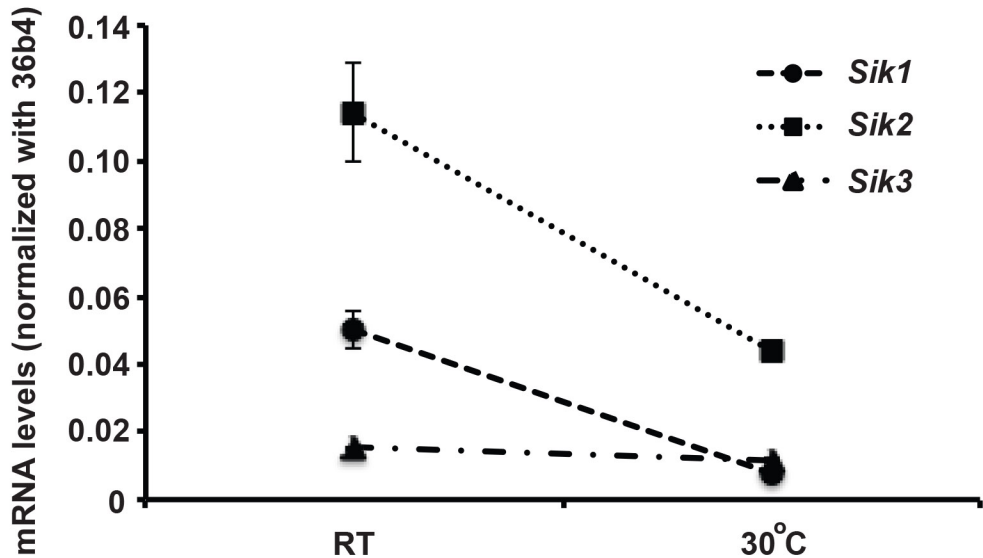

**Supplementary Figure 9**

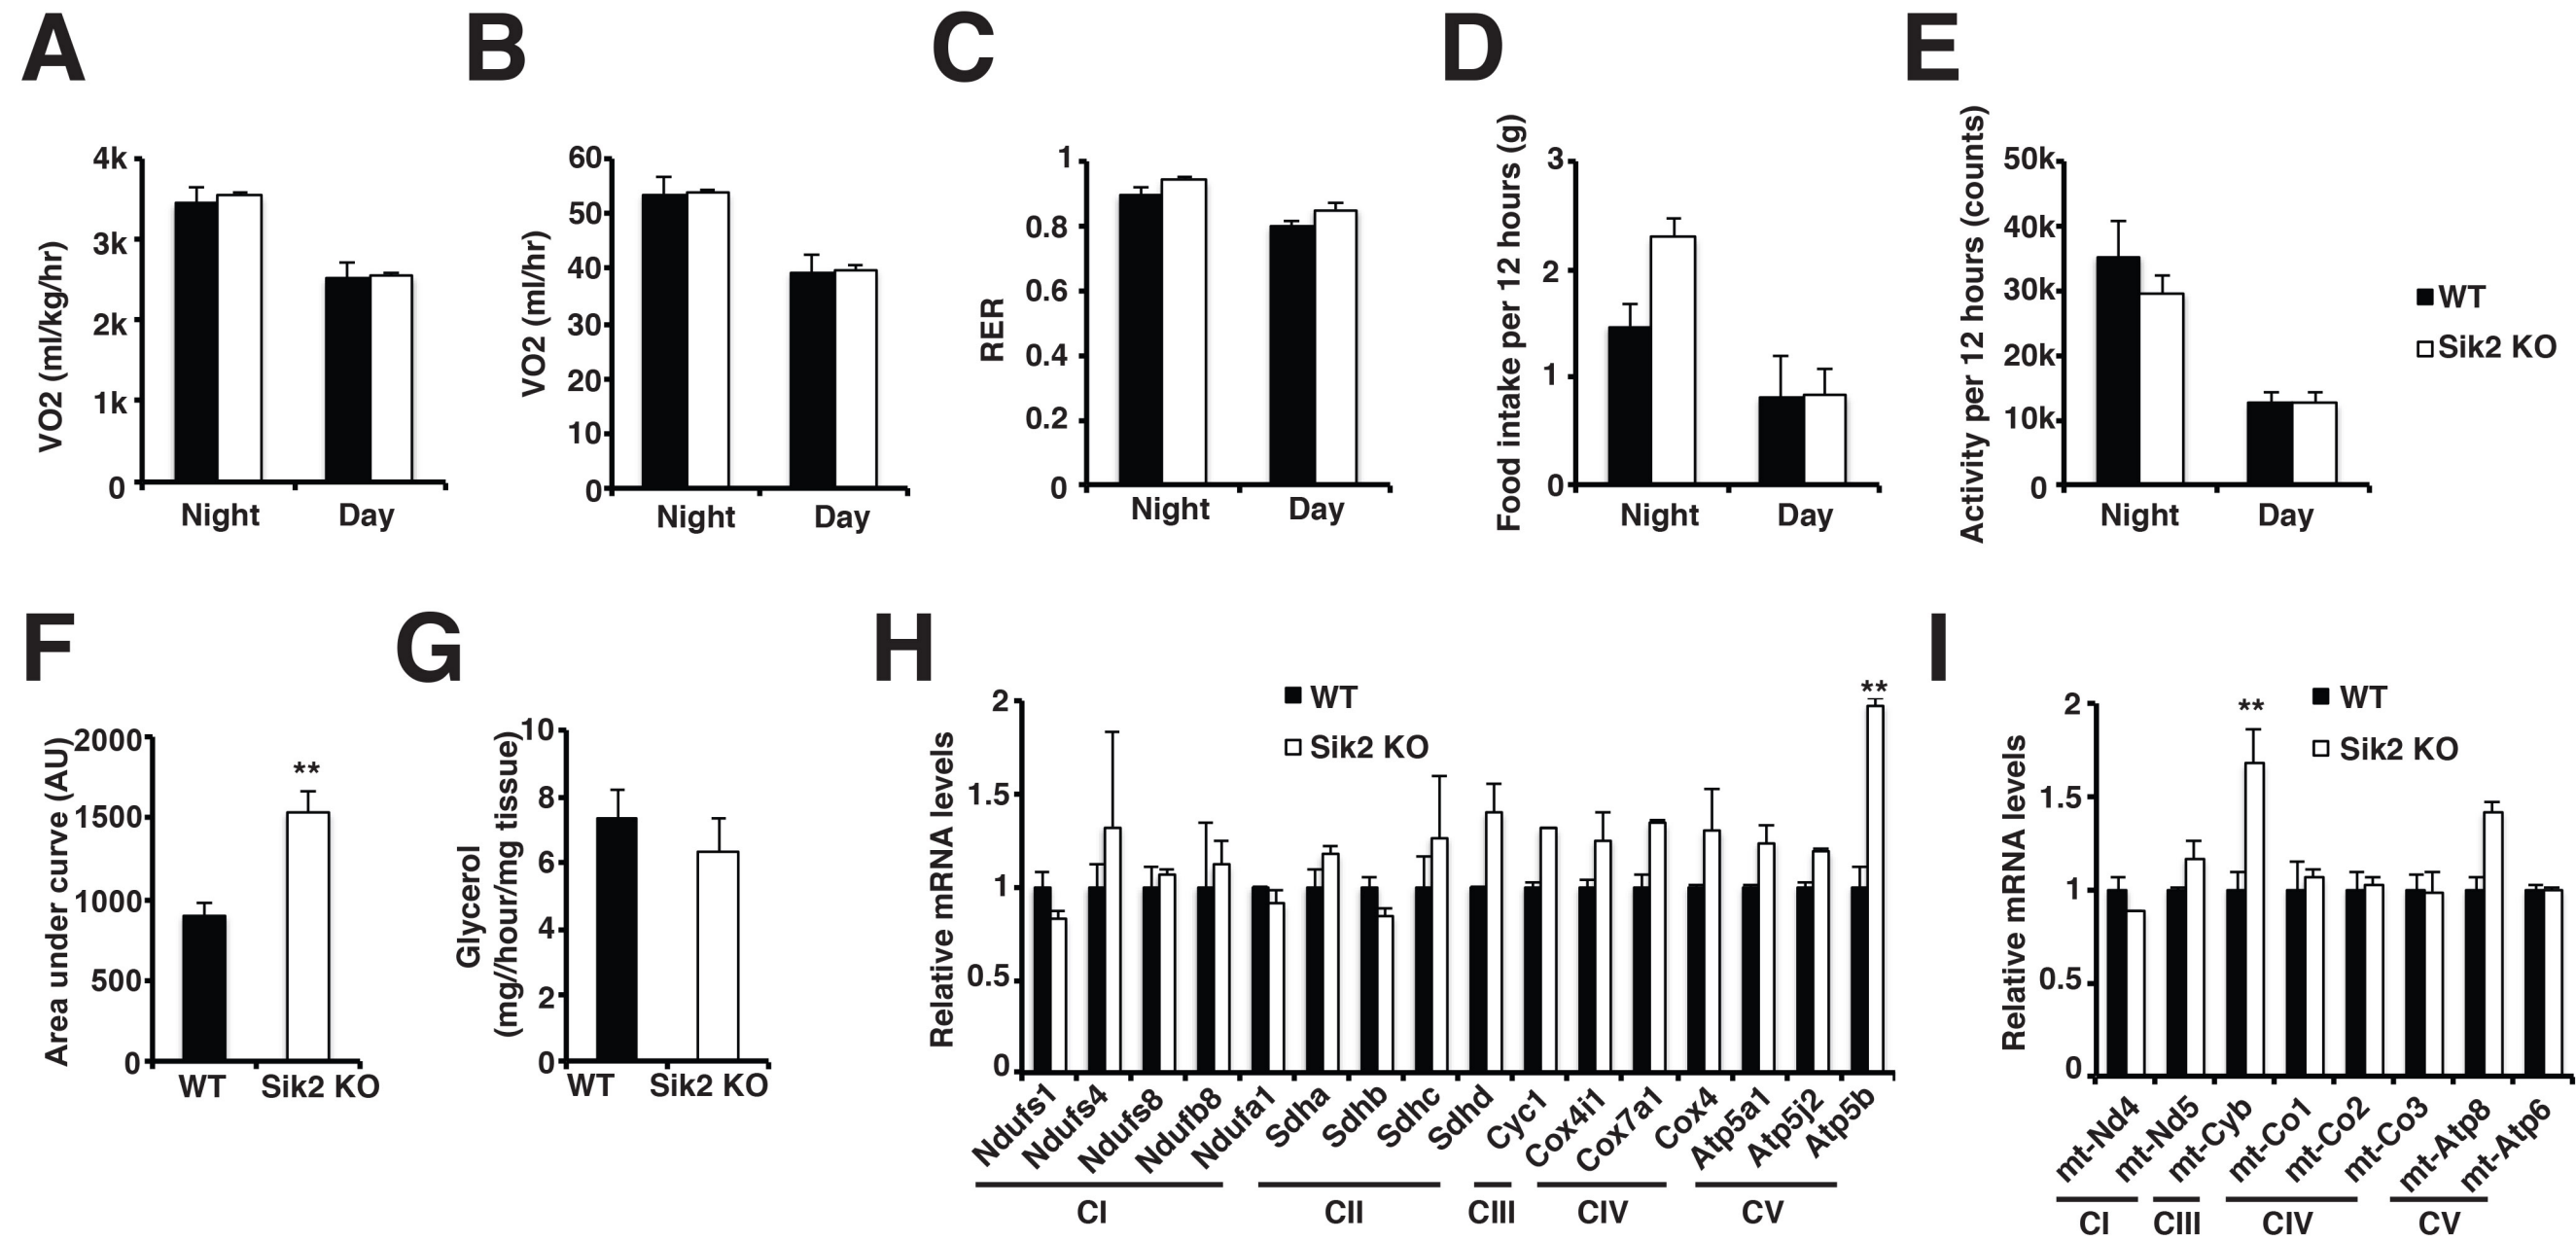

**Supplementary Figure 10**



**A**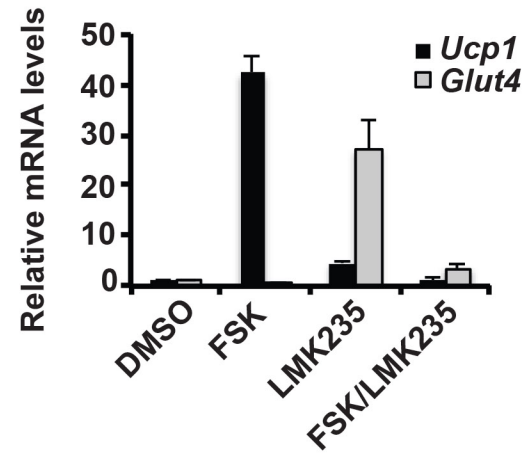**B**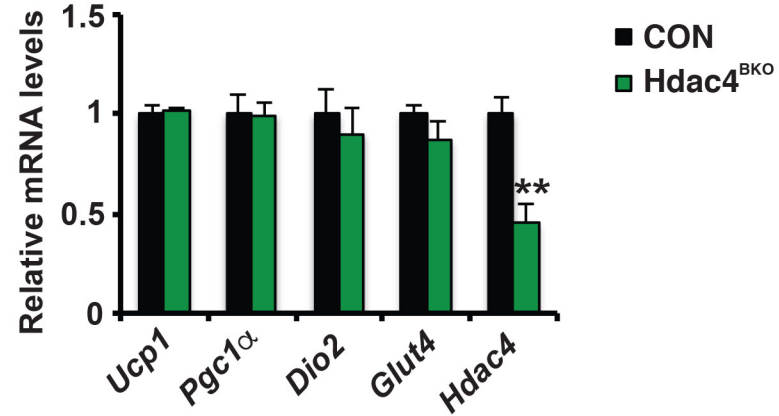**C**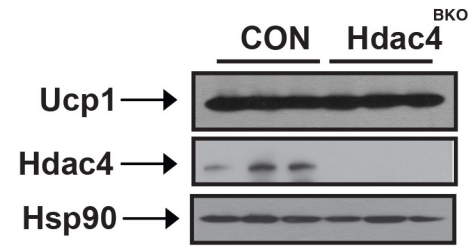**D**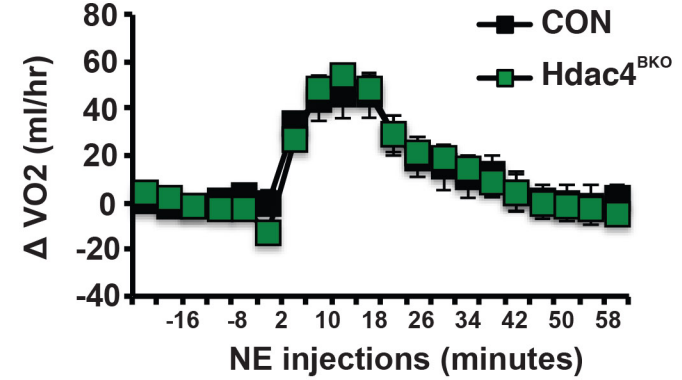**E**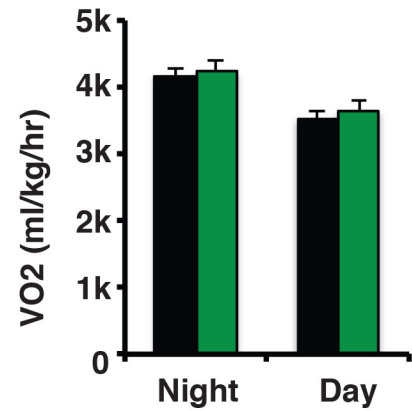**F**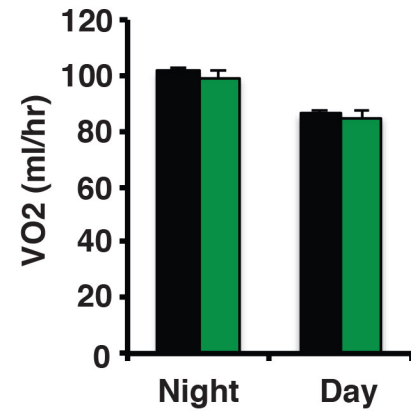**G**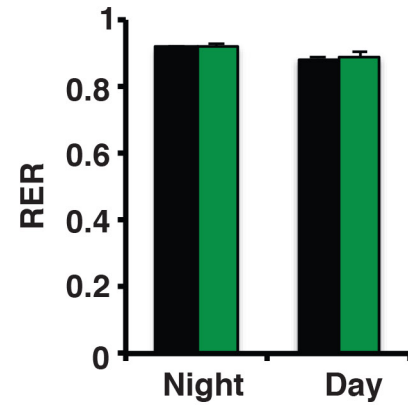**H**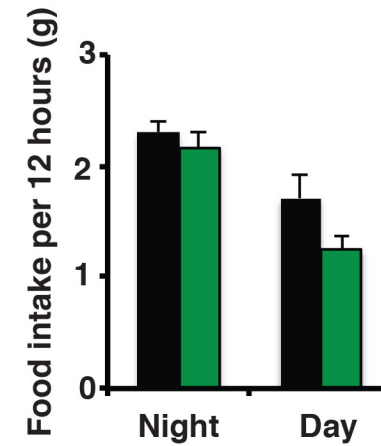**I**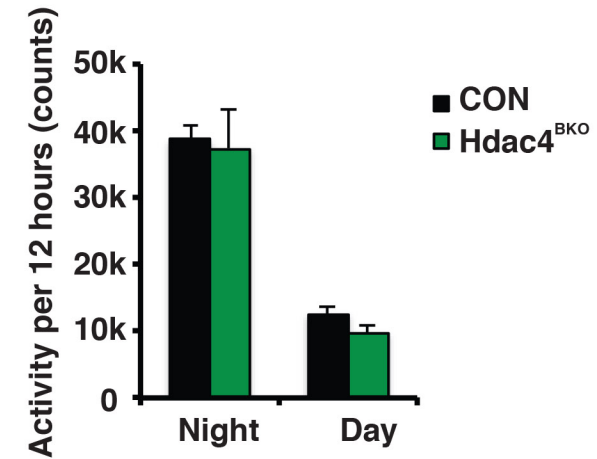

**Supplementary Figure 11**



## Supplementary table 1: List of primer sequences for q-PCR

---

|                  |                           |
|------------------|---------------------------|
| 36B4-F           | TTTGGGCATCACCACGAAAA      |
| 36B4-R           | GGACACCCTCCAGAAAGCGA      |
| Gnas-F           | GCAGAAGGACAAGCAGGTCT      |
| Gnas-R           | CCCTCTCCGTTAAACCCATT      |
| Ucp1-F           | ACTGCCACACCTCCAGTCATT     |
| Ucp1-R           | CTTTGCCTCACTCAGGATTGG     |
| Cox8b-F          | GAACCATGAAGCCAACGACT      |
| Cox8b-R          | GCGAAGTTCACAGTGGTTCC      |
| Cidea-F          | TGCTCTTCTGTATCGCCCAGT     |
| Cidea-R          | GCCGTGTTAAGGAATCTGCTG     |
| Pgc1 $\alpha$ -F | AGCCGTGACCACTGACAACGAG    |
| Pgc1 $\alpha$ -R | GCTGCATGGTTCTGAGTGCTAAG   |
| mt-Nd4-F         | CTAATAATCGCACATGGCCTC     |
| mt-Nd4-R         | CGTAGTTGGAGTTTGCTAGG      |
| mt-Nd5-F         | CATCCTTCTCAACTTTACTGGG    |
| mt-Nd5-R         | TTTATGGGTGTAATGCGGT       |
| mt-Cyb-F         | CCATTCTACGCTCAATCCCCA     |
| mt-Cyb-R         | AGGCTTCGTTGCTTTGAGGTA     |
| mt-Co1-F         | ACACAACTTTCTTTGATCCCG     |
| mt-Co1-R         | AGAATCAGAACAGATGCTGG      |
| mt-Co2-F         | ATAATCCCAACAAACGACCT      |
| mt-Co2-R         | CTCGGTTATCAACTTCTAGCA     |
| mt-Co3-F         | GGTATAATTCTATTCATCGTCTCGG |
| mt-Co3-R         | AGAACGCTCAGAAGAATCCT      |
| Ndufs1-F         | AGGATATGTTTCGCACAACTGG    |
| Ndufs1-R         | TCATGGTAACAGAATCGAGGGA    |
| Ndufs4-F         | CTGCCGTTTCCGTCTGTAGAG     |
| Ndufs4-R         | TGTTATTGCGAGCAGGAACAAA    |
| Ndufs8-F         | AGTGGCGGCAACGTACAAG       |
| Ndufs8-R         | TCGAAAGAGGTAAGTTAGGGTCA   |
| Sdha-F           | GGAACACTCCAAAAACAGACCT    |
| Sdha-R           | CCACCACTGGGTATTGAGTAGAA   |
| Sdhb-F           | AATTTGCCATTTACCGATGGGA    |
| Sdhb-R           | AGCATCCAACACCATAGGTCC     |
| Sdhc-F           | GCTGCGTTCTTGCTGAGACA      |
| Sdhc-R           | ATCTCCTCCTTAGCTGTGGTT     |
| Sdhd-F           | TGGTCAGACCCGCTTATGTG      |
| Sdhd-R           | GGTCCAGTGGAGAGATGCAG      |
| Cyc1-F           | CAGCTTCCATTGCGGACAC       |
| Cyc1-R           | GGCACTCACGGCAGAATGAA      |
| Cox4-F           | ATGTCACGATGCTGTCTGCC      |
| Cox4-R           | GTGCCCTGTTTCATCTCGGC      |
| Cox4i1-F         | ATTGGCAAGAGAGCCATTTCTAC   |
| Cox4i1-R         | CACGCCGATCAGCGTAAGT       |

---

---

|           |                           |
|-----------|---------------------------|
| Atp5a1-F  | TCTCCATGCCTCTAACACTCG     |
| Atp5a1-R  | CCAGGTCAACAGACGTGTCAG     |
| Atp5j2-F  | TGCCGAGCTGGATAATGATGC     |
| Atp5j2-R  | ACCATGCTAATCCCCGAGATG     |
| Atp5b-F   | GCAAGGCAGGGACAGCAGA       |
| Atp5b-R   | CCCAAGGTCTCAGGACCAACA     |
| mt-Atp8-F | GGCACCTTCACCAAAATCACT     |
| mt-Atp8-R | GGGGTAATGAATGAGGCAAATAGA  |
| mt-Atp6-F | CCTTCAATCCTATTCCCATCC     |
| mt-Atp6-R | GTTGGAAAGAATGGAGACGG      |
| Hdac4-F   | CACACCTCTTGGAGGGTACAA     |
| Hdac4-R   | AGCCCATCAGCTGTTTTGTC      |
| mtDNAF    | CGACCTCGATGTTGGATCA       |
| mtDNAR    | AGAGGATTTGAACCTCTGG       |
| B2MF      | TCTCTGCTCCCCACCTCTAAGT    |
| B2MR      | TGCTGTCTCGATGTTTGATGTATCT |

---
